26 Francesco Bettella            francesco.bettella@medisin.uio.no  
27 Sudheer Giddaluru            Sudheer.Giddaluru@uib.no  
28 Vidar M. Steen                vidar.martin.steen@helse-bergen.no  
29 Ole A. Andreassen            o.a.andreassen@medisin.uio.no  
30 Stephanie Le Hellard        stephanie.hellard@uib.no

31

32 **Abstract**

33 Background: One explanation for the persistence of schizophrenia despite the reduced  
34 fertility of patients is that it is a by-product of recent human evolution. This hypothesis is  
35 supported by evidence suggesting that recently-evolved genomic regions in humans are  
36 involved in the genetic risk for schizophrenia. Using summary statistics from genome-  
37 wide association studies (GWAS) of schizophrenia and 11 other phenotypes, we tested for  
38 enrichment of association with GWAS traits in regions that have undergone methylation  
39 changes in the human lineage compared to Neanderthals and Denisovans, i.e. human-  
40 specific differentially methylated regions (DMRs). We used analytical tools that evaluate  
41 polygenic enrichment of a subset of genomic variants against all variants.

42 Results: Schizophrenia was the only trait in which DMR SNPs showed clear enrichment of  
43 association that passed the genome-wide significance threshold. The enrichment was not  
44 observed for Neanderthal or Denisovan DMRs. The enrichment seen in human DMRs is  
45 comparable to that for genomic regions tagged by Neanderthal Selective Sweep markers,  
46 and stronger than that for Human Accelerated Regions. The enrichment survives multiple  
47 testing performed through permutation ( $n=10,000$ ) and bootstrapping ( $n=5,000$ ) in  
48 INRICH ( $p<0.01$ ). Some enrichment of association with height was observed at the gene  
49 level.

50 Conclusions: Regions where DNA methylation modifications have changed during recent  
51 human evolution show enrichment of association with schizophrenia and possibly with  
52 height. Our study further supports the hypothesis that genetic variants conferring risk of  
53 schizophrenia co-occur in genomic regions that have changed as the human species  
54 evolved. Since methylation is an epigenetic mark, potentially mediated by environmental  
55 changes, our results also suggest that interaction with the environment might have  
56 contributed to that association.

57

58 **Key Words:** differentially methylated regions; schizophrenia; evolution; epigenetics;  
59 height, Neanderthal Selective Sweep score; Human Accelerated Regions.

60

## 61 **Background**

62 Schizophrenia is a psychiatric disorder that has been reported throughout human history,  
63 possibly as far back as 5000 years [1, 2]. Family, twin and adoption studies estimate that  
64 schizophrenia has a high heritability of 60-90% [3–6]. Today, schizophrenia is estimated  
65 to have a prevalence of 1%. It is associated with reduced fertility and increased mortality  
66 [7–11], and its persistence despite this heavy burden is paradoxical. Power et al [11]  
67 leveraged Swedish registry data to demonstrate the reduced fecundity of patients with  
68 schizophrenia, despite the novel finding that sisters of individuals with schizophrenia had  
69 higher fitness than controls. They henceforth suggested hitherto unknown mechanisms for  
70 persistence of the disease. One explanation for this persistence is that evolution has  
71 indirectly selected the disease instead of eliminating it - the disease may co-segregate with  
72 creativity and intellectual prowess, providing selective advantages to the kin of affected  
73 individuals [9, 12]. Crow first argued that language and psychosis may have common  
74 origins, which could explain the persistence of schizophrenia in human populations [12,

75 13]. This evolutionary hypothesis of the origins of schizophrenia can now be tested, thanks  
76 to the identification of genetic factors implicated in schizophrenia [14–16] and the  
77 availability of datasets that reflect recent genomic evolution in humans [17–19].

78

79 Large genome-wide association studies (GWAS) have identified thousands of variants that  
80 are associated with schizophrenia [14–16] but our mechanistic understanding of the  
81 candidate variants is poor. One approach to investigating the function of schizophrenia-  
82 associated variants is comparative genomics, which investigates the evolutionarily  
83 relevance of certain genomic regions [20]. This field has introduced new datasets to test  
84 disease origins in humans, including Human Accelerated Regions (HARs) and  
85 Neanderthal Selective Sweep (NSS) scores [18, 19]. HARs are genomic regions that are  
86 highly conserved in non-human species, but have undergone rapid sequence change in the  
87 human lineage [20–24]. Xu et al [18] showed that genes near HARs are enriched for  
88 association with schizophrenia. Neanderthals were hominids that co-existed and even bred  
89 with modern humans [25, 26]. Comparison of Neanderthal and human genome sequences  
90 [27, 28] has revealed genomic regions that have experienced a selective sweep in modern  
91 humans, presumably following a favorable mutation [28]. Negative NSS scores can be  
92 used to pinpoint mutations (usually single nucleotide changes) that were positively  
93 selected in humans as they diverged from Neanderthals. Srinivasan et al [19] found that  
94 genomic regions tagged by negative NSS scores show enrichment of association with  
95 schizophrenia.

96

97 Using specific interpretation of genome sequencing in two recently extinct hominids,  
98 Neanderthals and Denisovans, Gokhman et al [29] mapped genome-wide methylation  
99 levels (i.e. the methylome) and compared them to modern humans. While 99% of the

100 methylation maps were identical in the three hominids, nearly 2000 differentially  
101 methylated regions (DMRs) were identified, which give the first clues about the role of  
102 epigenomic evolution in generating anthropometric differences between modern humans  
103 and their ancient cousins [29]. These DMRs provide a dataset of evolutionary annotations  
104 complementary to pre-existing datasets. Unlike HARs and NSS scores, which are based on  
105 DNA sequence changes, DMRs provide information on the evolution of epigenomes.  
106 Since epigenomes can act as an interface with the environment [30, 31], these datasets  
107 provide the opportunity to investigate environmentally driven evolutionary changes.  
108 Keeping in mind the evolutionary hypothesis for schizophrenia proposed by Crow, we thus  
109 examined if these evolutionary DMRs are enriched for association with schizophrenia. We  
110 also examined a range of human traits to compare the possible enrichment in other traits.  
111 Using previously published methodologies [19, 32, 33] and publicly available GWAS  
112 datasets we systematically analyzed twelve diverse phenotypes to investigate the potential  
113 role of regions susceptible to epigenetic variation in the emergence of specific traits in the  
114 human lineage.

115

## 116 **Results**

117 *SNPs in human-specific DMRs are enriched for association with schizophrenia.*

118 The genomic locations of human-specific DMRs were obtained from data published by  
119 Gokhman et al [29] (see Methods for full details). GWAS summary statistics for 12  
120 common traits were obtained from published datasets: schizophrenia [14], bipolar disorder  
121 (BPD) [34], attention deficit hyperactivity disorder (ADHD) [35], rheumatoid arthritis  
122 [36], high density lipoprotein [37], low density lipoprotein [37], triglycerides [37], total  
123 cholesterol [37], systolic blood pressure [38], diastolic blood pressure [38], body mass  
124 index [39], and height [40]. The GWAS datasets are summarized in Additional File 1,

125 Table S1. For each trait, we generated a list of single nucleotide polymorphisms (SNPs)  
126 within DMRs (positional annotation) and a list of SNPs in linkage disequilibrium (LD-  
127 based annotation) with markers within DMRs (Additional File 1, Table S1).

128

129 We used quantile-quantile (QQ) plots as described by Schork et al [32] to test whether the  
130 DMR SNPs are enriched for association with the GWAS trait compared to the complete  
131 set of SNPs (see Methods for additional details). In such plots the baseline is the null line  
132 of no difference between expected distribution of  $p$ -values and observed  $p$ -values.  
133 Deviation of the observed data distributions from the expected data distribution indicates  
134 the presence of true associations. When the  $p$ -values for a set of selected markers show  
135 greater leftwards deflection, they are enriched for association compared to the overall  
136 GWAS set. For the schizophrenia GWAS, enrichment was observed both for SNPs in LD  
137 with markers in DMRs (Figure 1; Additional File 1, Figure S1) and for SNPs located  
138 within DMRs (Figure 2). Although there was a slight leftward deflection in the higher  $p$ -  
139 values (smaller negative  $\log_{10}$  of  $p$ -values) in some other traits (e.g. height; Figure 1;  
140 Additional File 1, Figure S1), the observed enrichment only crosses the genome-wide  
141 significance level of  $5 \times 10^{-8}$  for the schizophrenia SNPs. The enrichment of disease-  
142 associated markers in DMRs is thus specific to schizophrenia and is independent of LD.

143

144 *Human-specific DMR enrichment in schizophrenia is independent of the MHC region,*  
145 *other genomic annotations and total markers genotyped*

146 The Major histocompatibility complex (MHC) region harbors several significant  
147 schizophrenia markers and could potentially bias our results because of long-range LD.  
148 The QQ plots show that the enrichment remains when the MHC is excluded (Figure 1) or  
149 included (Figure 2).

150

151 The schizophrenia GWAS had the highest density of markers genotyped (~9.4 million) and  
152 thus had the most SNPs in DMR regions (Additional File 1, Table S1), which could  
153 artificially inflate the enrichment. We normalized the total number of DMR SNPs with the  
154 total number of SNPs genotyped in each GWAS and found that the proportion of SNPs in  
155 DMRs is nearly identical for all traits (Additional File 1, Figure S3). To further eliminate  
156 the possibility that the enrichment is due to variation in the number of markers analyzed,  
157 we extracted ~2.4 million SNPs that were common across the twelve GWAS. Although  
158 not as strong as with the full set, the deflection observed for the schizophrenia GWAS  
159 remains higher than any other trait (Additional File 1, Figure S1), indicating the presence  
160 of significant disease markers in DMRs. These validations point to a true enrichment of  
161 association of the DMR SNPs with schizophrenia that is independent of the number of  
162 markers in a GWAS. It should be noted that we cannot rule out enrichment in the ADHD  
163 and BPD GWAS, because they are lacking in power (Additional File 1, Figure S1).

164

165 Additionally, we considered the distribution of schizophrenia-associated SNPs based on  
166 genomic annotations of 5' untranslated regions (5'UTRs), Exons, Introns and 3'  
167 untranslated regions (3'UTRs) [32]. Contrary to previously published findings [32], the  
168 enrichment was highest for intronic SNPs and lowest for 5'UTR SNPs (Additional File 1,  
169 Figure S4).

170

171 *Only human-specific DMRs are enriched for association with schizophrenia*

172 Next, we used QQ plots to test whether markers located in the Neanderthal- and  
173 Denisovan-specific DMRs are enriched for association with schizophrenia. Coordinates for  
174 these DMRs were obtained from data published by Gokhman et al, 2014 [29] (see Methods

175 for details). Since we do not know the precise coordinates of the MHC for Neanderthals  
176 and Denisovans, the analysis for human DMRs included the MHC region. No enrichment  
177 was observed for Neanderthal or Denisovan DMRs (Figure 2). It should be noted that this  
178 approach may not be appropriate for testing Neanderthal- and Denisovan-specific DMRs  
179 since (a) the schizophrenia GWAS was conducted in humans; (b) SNP and LD information  
180 is available only for humans; (c) the three hominids had variable number of DMRs, which  
181 affected the number of SNPs captured via positional annotation.

182

### 183 *Comparison of human DMRs with other evolutionary annotations*

184 We compared the enrichment observed for the human DMRs with the enrichment  
185 previously reported for NSS markers and HARs [18, 19] (see Methods for details). We  
186 first compared the enrichment via QQ plots and find that the enrichment of human DMRs  
187 in schizophrenia is comparable to that observed for NSS markers and far greater than that  
188 observed for HARs (Figure 3).

189

190 In these analyses, it was important to check the extent of overlap of markers (SNPs)  
191 annotated to various genomic regions of DMRs, NSS markers and HARs. Reassuringly,  
192 the various evolutionary annotations do not share the same group of markers, indicating  
193 that we did not test the same regions or SNPs (Additional File 1, Figure S2). The overlap  
194 between NSS markers and DMR markers involved less than 0.5% of all NSS markers and  
195 less than 0.2% of all DMR markers (Additional File 1, Figure S2). The SNPs in the DMRs  
196 thus represent a different group of markers that have not been annotated or analyzed  
197 previously from an evolutionary standpoint (Additional File 2, Additional File 3).

198

### 199 *Statistically-significant enrichment exists for human DMRs*



200 To determine the statistical significance of the DMR enrichment in schizophrenia, we  
201 utilized the INRICH software pipeline. INRICH is a pathway analysis tool for GWAS,  
202 designed for detecting enriched association signals of LD-independent genomic regions  
203 within biologically relevant gene sets (in our case genes which contain DMRs). It performs  
204 permutation and bootstrapping procedures to determine the significance of association of  
205 markers in LD intervals while maintaining the SNP density and gene density of the  
206 original intervals [33]. INRICH confirmed significant ( $p < 0.05$ ) enrichment of association  
207 for human DMRs with schizophrenia after correcting for multiple testing through  
208 bootstrapping at most  $p$ -value thresholds of LD intervals. Additionally, INRICH  
209 independently verified the previously reported enrichment of NSS markers with  
210 schizophrenia [19] (Figure 4). Furthermore, INRICH identified gene-level enrichment of  
211 association for DMRs with height (Additional File 1, Figure S5), while at the SNP level  
212 the enrichment in height was seen only for smaller effects, i.e. the enrichment did not  
213 remain below  $p < 10^{-8}$ .

214

#### 215 *Pathway analysis*

216 We utilized Ingenuity Pathway Analysis (IPA) to analyze DMR SNPs that show  
217 enrichment of association with schizophrenia (for details of the genes analyzed, please  
218 refer to the ‘Pathway analysis’ section in the Methods). We found ‘CREB signaling in  
219 neurons’ and ‘Synaptic long term potentiation’ amongst the top canonical pathways when  
220 analyzing pathways overrepresented in nervous system. Additionally, under physiological  
221 systems, ‘Nervous system development and function’ is also enriched (Additional File 1,  
222 Table S2). We repeated the same analysis for NSS markers as they also show enrichment  
223 of association with schizophrenia. ‘CREB signaling in neurons’ was also amongst the top  
224 canonical pathways for enriched NSS markers (Additional File 1, Table S4). Additionally,

225 we repeated the analyses with all organ systems and even then, ‘CREB signaling in  
226 neurons’ and ‘Synaptic long term potentiation’ emerged amongst the top canonical  
227 pathways for both enriched DMRs (Additional File 1, Table S3) and enriched NSS  
228 (Additional File 1, Table S5). This is an interesting result since there is very little marker  
229 overlap between the DMR and NSS SNPs (Additional File 1, Figure S2). Interestingly,  
230 genes containing enriched DMRs are also overrepresented in ‘Hair and skin development’  
231 when considering all organ systems (Additional File 1, Table S3). This may suggest  
232 potential gene-by-environment interactions, modulated by methylation variation over  
233 human evolution (see Discussion below).

234

## 235 **Discussion**

236 Our results suggest that SNPs in regions of the human genome that have undergone recent  
237 changes in DNA methylation status are enriched for association with schizophrenia, and to  
238 a lesser extent with height. Amongst all the traits analyzed, the enrichment observed in QQ  
239 plots was strongest for schizophrenia and passed the genome-wide significance threshold  
240 of  $5 \times 10^{-8}$  when the MHC was both excluded (Figure 1) and included (Figure 2). INRICH  
241 analysis confirms significant enrichment ( $p < 0.01$ ) in human DMRs that survived multiple  
242 testing through bootstrapping (Figure 4) for association with schizophrenia, and also  
243 suggests a possible effect on height (Additional File 1, Figure S5).

244

245 Xu et al [18] and Srinivasan et al [19] respectively demonstrated that variants located in  
246 HARs and in regions containing NSS markers were enriched for association with  
247 schizophrenia. In our study, we compared the evolutionary enrichments of schizophrenia  
248 risk variants in DMRs, NSS markers and HARs. We validate the results of Srinivasan et al  
249 [19] (Figure 3, Figure 4). HARs do not show enrichment of disease markers by QQ plots

250 and INRICH, unlike NSS markers and DMRs (Figure 3, Figure 4). This difference with the  
251 report of Xu et al could be due to a different freeze of the gene database used; it could also  
252 be because Xu et al. used a more stringent Hardy-Weinberg equilibrium (HWE) threshold  
253 to filter out markers from the schizophrenia GWAS [14], a step we could not replicate as  
254 the genotype data are not publicly available. We used the publicly available schizophrenia  
255 dataset that has a HWE  $p$ -value  $> 10^{-6}$  in controls and  $p$ -value  $> 10^{-10}$  in cases [14].  
256 Interestingly, all the evolutionary annotations (DMRs, NSS markers and HARs) cover  
257 different sections of the genome with very little overlap between them (Additional File 1,  
258 Figure S2). Between the three evolutionary annotations, nearly 70,000 SNPs occur around  
259 regions with evolutionary significance (Additional File 1, Figure S2). Our results supply a  
260 wealth of information on genomic regions that are important for the evolution of humans  
261 and are also enriched for schizophrenia risk variants (NSS markers and DMRs, Additional  
262 File 3). In addition, our study provides genetic support from two independent datasets that  
263 regions which differ between modern and ancient hominids could be implicated in the  
264 development of schizophrenia. An interesting hypothesis to consider is the possibility that  
265 methylation patterns are potentially driven by the genomic sequence underneath. This  
266 hypothesis is supported by preliminary findings presented at the recently concluded World  
267 Psychiatric Genetics Congress[41]. As such it is possible that the human specific DMRs  
268 analyzed here represent regions of the human genome where the underlying sequence  
269 might have diverged from Neanderthals and Denisovans. This hypothesis may be partially  
270 true as Gokhman et al[29] observed that some, but not all of the methylation changes were  
271 indeed driven by sequence changes. On the other hand, there also exist metastable  
272 epialleles where there are methylation differences in genetically identical individuals[42].  
273 As such, this would suggest that not all methylation differences are driven by the

274 underlying genomic sequence alone. We did not test whether the schizophrenia markers  
275 are human-specific or not and therefore should be investigated in future research.

276

277

278 Neanderthal- or Denisovan-specific DMRs showed no enrichment of association (Figure  
279 2). This suggests that SNPs conferring vulnerability to schizophrenia occur in genomic  
280 regions whose methylation levels were altered in the modern human lineage but not in the  
281 ancestral lineages. It is possible that the evolutionary changes driving the variation in  
282 methylation status could also have made the human lineage more vulnerable to  
283 schizophrenia. A caveat to this result is that the LD structure in archaic genomes is  
284 unknown, so we cannot test LD-based enrichment in Neanderthal or Denisovan genomes.  
285 Our inter-lineage analyses with enrichment plots were thus restricted to SNPs occurring  
286 exclusively *within* DMRs. The other limitation to this comparative approach is that the  
287 GWAS data is specific to modern humans.

288

289 In previous studies [32], it was reported that 5'UTRs are the functional annotation  
290 harboring the most association with a given trait. However, the DMRs enriched for  
291 association with schizophrenia tended to localize in intronic regions (Additional File 1,  
292 Figure S4), which is in agreement with the expectation that methylation regions should not  
293 be localized in exons and UTRs. This shows that using more information to label some  
294 genomic regions in greater detail, such as potential regulatory regions in introns, might  
295 give a more precise annotation of regions of association.

296

297 Despite the genetic overlap between bipolar disorder and schizophrenia, we do not find  
298 evidence of enrichment of association of DMRs with bipolar disorder either at the SNP

299 level (Figure 1; Additional File 1, Figure S1) or the gene level (data available on request).  
300 This could possibly be due to lack of sufficient power in the bipolar disorder GWAS [34].  
301 Additionally, the gene-level approach utilized by INRICH depicts enrichment of  
302 association of human DMRs with height (Additional File 1, Figure S5). This evidence is  
303 lacking at the SNP level as depicted by QQ plots (Figure 1; Additional File 1, Figure S1).  
304 We speculate that this could be due to the difference in testing DMR-localized SNPs  
305 compared to genes flanking human DMRs.

306

307 Although the DMRs utilized here were obtained from bone samples, Gokhman et al [29]  
308 assert that the DMRs refer to species-specific methylation differences and not tissue-  
309 specific variations[43]. Similarly, Hernando-Herraez et al [44] noted that species-specific  
310 DMRs tend to be conserved across tissues and as such should not represent tissue-specific  
311 variations. Other studies also showed that neurological systems were enriched for  
312 methylation differences even when the tissue samples analyzed were not neurological [45–  
313 47]. Therefore, we believe that our results are valid for a ‘brain’ phenotype even though  
314 the DMRs were derived from non-brain tissues. The enrichment seen for schizophrenia  
315 also corroborates the results of Gokhman et al [29] who reported that DMRs were more  
316 enriched around genes implicated in the nervous system amongst all the organ systems  
317 tested for evolutionary changes in methylation patterns. Hernando-Herraez et al [44] also  
318 found that methylation differences between humans and great apes were located around  
319 genes controlling neurological and developmental features. It is therefore possible that the  
320 methylation differences were mediated by evolution of genomic regions controlling  
321 neurodevelopmental processes. The results of pathway analysis are consistent with this.  
322 Both the DMR and NSS regions that are enriched for association with schizophrenia

323 contain genes that are overrepresented in ‘CREB signaling in neurons’ and ‘Synaptic long  
324 term potentiation’.

325

326 Our results hint that epigenomic evolution has taken place in genomic regions implicated  
327 in the aetiology of schizophrenia. Furthermore, these regions harbor markers that are  
328 involved in the regulation of various neurodevelopmental pathways. The fact that  
329 methylation changes also took place in these very same regions suggests a complex gene-  
330 by-environment interaction in the evolution of humans, especially for pathways that led to  
331 the development of our brain. While it is known that various factors from the environment  
332 can make long-lasting changes in DNA methylation patterns that can be subsequently  
333 inherited at a population level [30, 31, 48], the true significance of our findings from an  
334 evolutionary standpoint suggests that the superior mental abilities of our species may in  
335 part have been driven by environmental factors during the past 300,000 years [49, 50].

336 It is difficult to put an exact date on the emergence of the superior mental abilities that  
337 define the modern *Homo sapiens*. Anthropologists often date the onset of the advanced  
338 intellectual abilities of *Homo sapiens* from about 70,000 years onwards [51], a period  
339 which saw the emergence of art, religion [52, 53] and possibly spoken language [54]. From  
340 an evolutionary perspective, it suggests a massive leap in the animal kingdom because  
341 *Homo sapiens* became the first species not only to develop the capacity to think and  
342 imagine things that do not exist [52, 53], but also to communicate these ideas to other  
343 members of the species [54]. This ability would have been critical for effective  
344 coordination and cooperation within large groups and may even have been needed to keep  
345 a group together [55, 56]. The genomic approach to analyze mental disorders used in the  
346 present study and other studies can interrogate the effect of changes which appeared in the  
347 last 300,000 years [49, 50], but it will clearly be interesting to trace mores recent changes.

348 If a similar method used in the reconstruction of Neanderthal and Denisovan genomes [29,  
349 57] could be implemented on samples of ancient *Homo sapiens* from different time periods  
350 [58–65], then theoretically it should be possible to reconstruct the methylomes and regions  
351 of recent evolution from ancient humans [66]. Subsequently, more detailed ‘time-course’  
352 analyses of changes in methylation patterns and in other regions of recent evolution and  
353 their implications in schizophrenia will surely result in more detailed elucidation of the  
354 evolutionary hypothesis of schizophrenia. This is the promise of the novel field of  
355 paleoepigenetics that seeks to infer past environmental cues that affected the epigenomes  
356 of ancient individuals[42, 43].

357

## 358 **Conclusions**

359 In summary, we have demonstrated that human genomic regions whose methylation status  
360 was altered during evolution are enriched in markers that show association with  
361 schizophrenia. Our results concur with previous genomic studies demonstrating that  
362 methylation changes in *Homo sapiens* have had the greatest impact on the nervous system.  
363 and provide evidence that epigenomic evolution plays a role in conferring a high risk of  
364 schizophrenia on humans. Future research should attempt to perform a finer temporal  
365 resolution of the origins of psychosis through the prism of evolutionary epigenomics. To  
366 explore the period of evolution before the *Homo* lineage, it would also be interesting to  
367 determine whether methylation signatures from primates are enriched for schizophrenia  
368 markers. Future research should also investigate the influence of human-specific DMRs on  
369 height.

370

## 371 **Methods**

372 *Differentially Methylated Region data*

373 Coordinates for DMRs were obtained from data publicly available in Supplementary Table  
374 S2 of Gokhman et al, 2014 [29]. This file contained DMRs inferred by comparing genome  
375 sequence of fossilized Neanderthal and Denisovan limb samples with methylation data  
376 from osteoblasts of modern humans. From the genomes of the Neanderthal and Denisovan  
377 samples, Gokhman et al inferred methylation by utilizing the natural degradation of  
378 methylated cytosine (C) to thymine (T) to create a C→T ratio [29]. The methylation  
379 information, in the form of C→T ratio, was then compared with each of the three species  
380 and classified according to the hominid in which the methylation change occurred, i.e.  
381 human-specific, Neanderthal-specific and Denisovan-specific DMRs. These DMRs do not  
382 represent tissue-specific methylation but species-specific methylation [29]. The human-  
383 specific DMRs comprise regions that have both gained and lost methylation in comparison  
384 to Neanderthal- and Denisovan-specific DMRs. DMRs that could not be classified reliably  
385 in any of the three species (unclassified DMRs) [29] were not used. Full methodological  
386 details for assigning DMRs are in the Supplementary File of the original paper [29].

387

#### 388 *HAR data*

389 Genomic coordinates were obtained from publicly available data ([docpollard.com/2x](http://docpollard.com/2x)) for  
390 three classes of human accelerated region: HARs, in which regions conserved in mammals  
391 are accelerated in humans; PARs, in which regions conserved in mammals are accelerated  
392 in primates; and pHARs, in which regions conserved in primates (but not other mammals)  
393 are accelerated in humans. Conversion to hg19 assembly was performed using the liftOver  
394 tool from the UCSC Genome Browser.

395

#### 396 *NSS data*



397 NSS data was obtained as a list of markers with corresponding NSS values from  
398 Srinivasan et al [19]. Markers with negative values, indicating positive selection in  
399 humans, were filtered out and used for analysis.

400

#### 401 *GWAS data*

402 Summary statistics from GWAS of 12 common traits were obtained from published  
403 datasets: schizophrenia (SCZ) [14], bipolar disorder (BPD) [34], attention deficit  
404 hyperactivity disorder (ADHD) [35], rheumatoid arthritis (RA) [36], blood lipid markers  
405 (high density lipoprotein (HDL), low density lipoprotein (LDL), triglycerides (TG), total  
406 cholesterol (TC)) [37], blood pressure (systolic blood pressure (SBP), diastolic blood  
407 pressure (DBP)) [38], body mass index (BMI) [39], and height [40]. For studies published  
408 with hg18 coordinates (BPD, SBP, DBP, HDL, LDL, TG, TC, ADHD, RA), conversion to  
409 hg19 was performed using the command line version of the liftOver tool from the UCSC  
410 Genome Browser (<http://hgdownload.cse.ucsc.edu/downloads.html> #utilities\_downloads).  
411 For BMI and height SNPs, the genomic coordinates were obtained by mapping them to the  
412 assembly of 1000 Genomes Project Phase 1 reference panel SNPs [67].

413

#### 414 *SNP assignment to DMRs*

415 SNPs were assigned to DMRs with LDsnpr [68] using positional binning and LD (linkage  
416 disequilibrium)-based binning in R [69]. We used both methods because DMR-localized  
417 SNPs that were not genotyped in a specific GWAS would be missed if we used positional  
418 binning alone [68] (Additional File 1, Table S1). The LD file utilized in HDF5 format was  
419 constructed on the European reference population of 1000 Genomes Project and can be  
420 publicly downloaded at: <http://services.cbu.uib.no/software/ldsnpr/Download>.

421

422 *Enrichment analyses with stratified Quantile-Quantile (QQ) Plots*

423 QQ plots are an effective tool to visualize the spread of data and any deviations from the  
424 expected null distributions. They are frequently utilized in GWAS to depict enrichment of  
425 true signals. When the observed distribution of data matches the expected distribution,  
426 there is a lack of enrichment and a line of equality is obtained that depicts the null  
427 hypothesis. A distribution such as this reflects no enrichment of observed over expected  
428 data distribution. However, if the observed and expected distributions differ, there will be  
429 deviation from this null line. As described in detail by Schork et al [32], leftwards  
430 deflections from this null line represent enrichment. The higher the leftward deflection, the  
431 greater is the enrichment of true signals. In GWASs, due to the extremely low  $p$ -values of  
432 SNPs, it is common to depict  $p$ -values by converting them to negative  $\log_{10}$  values so that  
433 smaller  $p$ -values give higher negative logarithmic values. We plotted the negative  $\log_{10}$  of  
434 the observed  $p$ -values of SNPs against the expected negative  $\log_{10}$  of a normal distribution.  
435 The distributions were corrected for genomic inflation by  $\lambda_{GC}$ . This method of enrichment  
436 was used to show for example [32] that specific genomic regions are enriched for trait-  
437 associated SNPs and are much more likely to associate with a given trait than SNPs  
438 distributed across a genome. In other words, when SNPs are stratified according to specific  
439 genomic regions, there is a greater enrichment of true signals than what is observed in the  
440 GWAS. Using a similar approach, we binned SNPs that fall in DMR regions and plotted  
441 the stratified  $p$ -value distribution.

442

443 *Enrichment analyses with INRICH*

444 The stratified QQ plots are a useful visual tool for observing the presence or absence of  
445 enrichment of true signals in a given set of SNPs. However, to quantify the enrichment  
446 visually observed, we used the INterval ENRICHment Analysis (INRICH) tool. It is a

447 robust bioinformatics pipeline to determine enrichment of genomic intervals implicated by  
448 LD with predefined or custom gene sets [33]. It takes into account several potential biases  
449 that can otherwise lead to false positives. It is well suited for testing GWAS-implicated  
450 SNPs for association with gene sets as it controls for variable gene size, SNP density, LD  
451 within and between genes, and overlapping genes with similar annotations. We followed  
452 the procedure described by Xu et al [18], with the extended MHC region (chr6:25-35Mb)  
453 masked and SNPs with minor allele frequency (MAF) <0.05 excluded. Full details may be  
454 found in Additional File 1.

455

#### 456 *Pathway analysis*

457 Pathway analysis was performed using Ingenuity Pathway Analysis (IPA) from QIAGEN  
458 ([www.qiagen.com/ingenuity](http://www.qiagen.com/ingenuity), last accessed 26<sup>th</sup> August 2016). The reference set was  
459 Ingenuity Knowledge Base (Genes). Both direct and indirect relationships were analyzed.  
460 All data sources were included with the confidence parameter set to experimentally  
461 observed and highly predicted pathways for Human. Under ‘Tissues & Cell Lines’, we  
462 performed the analysis once with all organ systems and once with only the nervous system.  
463 5338 enriched DMR SNPs in 329 enriched DMRs (Additional File 3) were mapped to 349  
464 unique RefSeq genes and 446 RefSeq genes in LD using the method of Schork et al [32].  
465 Genes in LD blocks containing enriched NSS markers were determined in a similar  
466 manner. 4276 enriched NSS markers mapped to 648 overlapping RefSeq genes and 1363  
467 RefSeq genes in LD. IPA was performed on these gene lists.

468

#### 469 **Additional Files**

470 Additional File 1: Additional Method, Figures and Tables

471 Additional File 2: Annotation of all DMRs with schizophrenia-associated SNPs. This file  
472 contains annotation of all the human-lineage specific DMRs that are associated with  
473 schizophrenia markers. Details of the various markers present within each DMR is  
474 provided, along with the marker with most significant *p*-value .

475 Additional File 3: Annotation of enriched DMRs with genes, promoters, CpG islands and  
476 enhancers. This file contains detailed annotation of those human-lineage specific DMRs  
477 that are enriched for association with schizophrenia markers(except those in the MHC  
478 region). Compared to Additional File 2, these DMRs represent those that are enriched and  
479 whether they are present in any genes, promoters, enhancers or CpG islands.

480

481

## 482 **Abbreviations**

483 (3'UTR): 3' untranslated region, (5'UTR): 5' untranslated region, (ADHD): attention  
484 deficit hyperactivity disorder, (BMI): body mass index, (BPD): bipolar disorder, (CpG): 5'  
485 Cytosine-phosphate-Guanine 3', (CREB): cyclic adenosine monophosphate responsive  
486 element binding protein, (DBP): diastolic blood pressure, (DMR): differentially  
487 methylated region, (DNA): deoxyribonucleic acid, (GWAS):genome-wide association  
488 studies, (HARs): Human Accelerated Regions, (HDL): high density lipoprotein, (HWE):  
489 Hardy-Weinberg equilibrium, (INRICH): Interval enRICHment analysis tool , (IPA):  
490 Ingenuity Pathway Analysis, (LD): linkage disequilibrium, (LDL): low density  
491 lipoprotein, (MAF): minor allele frequency, (MHC): Major histocompatibility complex,  
492 (NSS): Neanderthal Selective Sweep, (QQ): quantile-quantile, (RA): rheumatoid arthritis,  
493 (SBP): systolic blood pressure, (SCZ): schizophrenia, (SNP): single nucleotide  
494 polymorphism, (TC): total cholesterol, (TG): triglycerides.

495

496

497 **Declarations**

498 *Ethics Approval and consent to participate*

499 Not applicable

500

501 *Consent for publication*

502 Not applicable

503

504 *Availability of Data and Materials*

505 The code supporting the results of this article is available in the Zenodo repository at

506 <http://doi.org/10.5281/zenodo.198451>. GWAS datasets, DMR data and HAR data are

507 publicly available as described in the Methods section.

508

509 *Competing interests*

510 The authors declare that they have no competing interests.

511

512 *Funding*

513 This work was supported by the Research Council of Norway (NFR; NORMENT-Centre

514 of Excellence #2 T23273) and the KG Jebsen Foundation (SKGJ-MED-008). The funding

515 bodies had no role in the collection, analysis or interpretation of the data, or in preparing

516 the manuscript for publication.

517

518 *Authors' contributions*

519 NB carried out the bioinformatics analyses, contributed to the design of the study and

520 drafted the manuscript. TP, SG, FB contributed to statistical and LD analyses. OAA and

521 VMS critically revised the manuscript. SLH conceived of the study, participated in its

522 design and coordination, and helped to draft the manuscript. All authors read and approved  
523 the final manuscript.

524

### 525 *Acknowledgements*

526 We thank Profs. Anders Dale and Wesley Thompson, University of California, San Diego  
527 for helpful discussions and Isabel Hanson Scientific Writing for formatting and  
528 submission. The code used to generate the QQ plots was graciously made publicly  
529 available by Matthew Flickinger PhD, University of Michigan at  
530 [http://genome.sph.umich.edu/wiki/Code\\_Sample:\\_Generating\\_QQ\\_Plots\\_in\\_R](http://genome.sph.umich.edu/wiki/Code_Sample:_Generating_QQ_Plots_in_R). We thank  
531 Ke Xu from Icahn School of Medicine, Mount Sinai for providing the URL for  
532 downloading the HAR datasets. We thank the author of the book *Sapiens: A Brief History*  
533 *of Humankind*, Yuval Noah Harari, PhD, for some of the ideas discussed in the paper.  
534 Finally, we thank the reviewers for their time and their suggestions for improving the  
535 manuscript.

536

### 537 **References**

- 538 1. Shih RA, Belmonte PL, Zandi PP: A review of the evidence from family, twin and  
539 adoption studies for a genetic contribution to adult psychiatric disorders. *Int Rev*  
540 *Psychiatry* 2004, 16:260–83.  
541
- 542 2. Jeste DV, Del Carmen R, Lohr JB, Wyatt RJ: Did schizophrenia exist before the  
543 eighteenth century? *Compr Psychiatry* 1985, 26:493–503.  
544
- 545 3. Skre I, Onstad S, Torgersen S, Lygren S, Kringlen E: A twin study of DSM-III-R  
546 anxiety disorders. *Acta Psychiatr Scand* 1993, 88:85–92.  
547
- 548 4. Cardno AG, Marshall EJ, Coid B, Macdonald AM, Ribchester TR, Davies NJ, Venturi  
549 P, Jones LA, Lewis SW, Sham PC, others: Heritability estimates for psychotic disorders:  
550 the Maudsley twin psychosis series. *Arch Gen Psychiatry* 1999, 56:162–168.  
551
- 552 5. Sullivan PF, Kendler KS, Neale MC: Schizophrenia as a complex trait: evidence from a  
553 meta-analysis of twin studies. *Arch Gen Psychiatry* 2003, 60:1187–1192.  
554

- 555 6. Lichtenstein P, Yip BH, Björk C, Pawitan Y, Cannon TD, Sullivan PF, Hultman CM:  
556 Common genetic determinants of schizophrenia and bipolar disorder in Swedish families:  
557 a population-based study. *Lancet* 2009, 373:234–239.  
558
- 559 7. Larson CA, Nyman GE: Differential fertility in schizophrenia. *Acta Psychiatr Scand*  
560 1973, 49:272–80.  
561
- 562 8. Bassett AS, Bury A, Hodgkinson KA, Honer WG: Reproductive fitness in familial  
563 schizophrenia. *Schizophr. Res.* 1996, 21:151–60.  
564
- 565 9. Nichols C: Is there an evolutionary advantage of schizophrenia? *Pers Individ Diff* 2009,  
566 46:832–838.  
567
- 568 10. Brown S: Excess mortality of schizophrenia. A meta-analysis. *Br J Psychiatry* 1997,  
569 171:502–508.  
570
- 571 11. Power RA, Kyaga S, Uher R, MacCabe JH, Långström N, Landen M, McGuffin P,  
572 Lewis CM, Lichtenstein P, Svensson AC: Fecundity of patients with schizophrenia,  
573 autism, bipolar disorder, depression, anorexia nervosa, or substance abuse vs their  
574 unaffected siblings. *JAMA psychiatry* 2013, 70:22–30.  
575
- 576 12. Crow TJ: A Darwinian approach to the origins of psychosis. *Br J Psychiatry* 1995,  
577 167:12–25.  
578
- 579 13. Crow TJ: Is schizophrenia the price that Homo sapiens pays for language? *Schizophr.*  
580 *Res.* 1997, 28:127–41.  
581
- 582 14. Consortium SWG of the PG, others: Biological insights from 108 schizophrenia-  
583 associated genetic loci. *Nature* 2014, 511:421–427.  
584
- 585 15. Ripke S, O’Dushlaine C, Chambert K, Moran JL, Kähler AK, Akterin S, Bergen SE,  
586 Collins AL, Crowley JJ, Fromer M, others: Genome-wide association analysis identifies  
587 13 new risk loci for schizophrenia. *Nature Genet* 2013, 45:1150–1159.  
588
- 589 16. Consortium SPG-WAS (GWAS), others: Genome-wide association study identifies  
590 five new schizophrenia loci. *Nature Genet* 2011, 43:969–976.  
591
- 592 17. Crespi B, Summers K, Dorus S: Adaptive evolution of genes underlying schizophrenia.  
593 *Proc Roy Soc Lond [Biol]* 2007, 274:2801–2810.  
594
- 595 18. Xu K, Schadt EE, Pollard KS, Roussos P, Dudley JT: Genomic and network patterns  
596 of schizophrenia genetic variation in human evolutionary accelerated regions. *Mol Biol*  
597 *Evol* 2015, 32:1148–1160.  
598
- 599 19. Srinivasan S, Bettella F, Mattingsdal M, Wang Y, Witoelar A, Schork AJ, Thompson  
600 WK, Zuber V, Winsvold BS, Zwart J-A, others: Genetic markers of human evolution are  
601 enriched in schizophrenia. *Biol Psychiatry* 2015, 80:284–292.  
602
- 603 20. Pollard KS, Salama SR, King B, Kern AD, Dreszer T, Katzman S, Siepel A, Pedersen  
604 JS, Bejerano G, Baertsch R, others: Forces shaping the fastest evolving regions in the

- 605 human genome. *PLoS Genet* 2006, 2:e168.  
606
- 607 21. Lindblad-Toh K, Garber M, Zuk O, Lin MF, Parker BJ, Washietl S, Kheradpour P,  
608 Ernst J, Jordan G, Mauceli E, Ward LD, Lowe CB, Holloway AK, Clamp M, Gnerre S,  
609 Alföldi J, Beal K, Chang J, Clawson H, Cuff J, Di Palma F, Fitzgerald S, Flicek P,  
610 Guttman M, Hubisz MJ, Jaffe DB, Jungreis I, Kent WJ, Kostka D, Lara M, Martins AL,  
611 Masingham T, Moltke I, Raney BJ, Rasmussen MD, Robinson J, Stark A, Vilella AJ,  
612 Wen J, Xie X, Zody MC, Baldwin J, Bloom T, Whye Chin C, Heiman D, Nicol R,  
613 Nusbaum C, Young S, Wilkinson J, Worley KC, Kovar CL, Muzny DM, Gibbs R a., Cree  
614 A, Dihn HH, Fowler G, Jhangiani S, Joshi V, Lee S, Lewis LR, Nazareth LV, Okwuonu G,  
615 Santibanez J, Warren WC, Mardis ER, Weinstock GM, Wilson RK, Delehaunty K,  
616 Dooling D, Fronik C, Fulton L, Fulton B, Graves T, Minx P, Sodergren E, Birney E,  
617 Margulies EH, Herrero J, Green ED, Haussler D, Siepel A, Goldman N, Pollard KS,  
618 Pedersen JS, Lander ES, Kellis M: A high-resolution map of human evolutionary  
619 constraint using 29 mammals. *Nature* 2011, 478:476–482.  
620
- 621 22. Bush EC, Lahn BT: A genome-wide screen for noncoding elements important in  
622 primate evolution. *BMC Evol Biol* 2008, 8:17.  
623
- 624 23. Bird CP, Stranger BE, Liu M, Thomas DJ, Ingle CE, Beazley C, Miller W, Hurles ME,  
625 Dermitzakis ET: Fast-evolving noncoding sequences in the human genome. *Genome Biol*  
626 2007, 8:R118.  
627
- 628 24. Prabhakar S, Noonan JP, Pääbo S, Rubin EM: Accelerated evolution of conserved  
629 noncoding sequences in humans. *Science* 2006, 314:786.  
630
- 631 25. Sankararaman S, Mallick S, Dannemann M, Prüfer K, Kelso J, Pääbo S, Patterson N,  
632 Reich D: The genomic landscape of Neanderthal ancestry in present-day humans. *Nature*  
633 2014, 507:354–7.  
634
- 635 26. Vernot B, Akey JM: Resurrecting surviving Neandertal lineages from modern human  
636 genomes. *Science* 2014, 343:1017–1021.  
637
- 638 27. Prüfer K, Racimo F, Patterson N, Jay F, Sankararaman S, Sawyer S, Heinze A, Renaud  
639 G, Sudmant PH, de Filippo C, others: The complete genome sequence of a Neanderthal  
640 from the Altai Mountains. *Nature* 2014, 505:43–49.  
641
- 642 28. Green RE, Krause J, Briggs AW, Maricic T, Stenzel U, Kircher M, Patterson N, Li H,  
643 Zhai W, Fritz MH-Y, others: A draft sequence of the Neandertal genome. *Science* 2010,  
644 328:710–722.  
645
- 646 29. Gokhman D, Lavi E, Prüfer K, Fraga MF, Riancho JA, Kelso J, Pääbo S, Meshorer E,  
647 Carmel L: Reconstructing the DNA methylation maps of the Neandertal and the  
648 Denisovan. *Science* 2014, 344:523–527.  
649
- 650 30. Giuliani C, Sazzini M, Bacalini MG, Pirazzini C, Marasco E, Fontanesi E, Franceschi  
651 C, Luiselli D, Garagnani P: Epigenetic variability across human populations: a focus on  
652 DNA methylation profiles of the KRTCAP3, MAD1L1 and BRSK2 genes. *Genome*  
653 *biology and evolution* 2016, 8:2760–2773.  
654



- 655 31. Grönninger E, Weber B, Heil O, Peters N, Stüb F, Wenck H, Korn B, Winnefeld M,  
656 Lyko F: Aging and chronic sun exposure cause distinct epigenetic changes in human skin.  
657 *PLoS Genet.* 2010, 6:e1000971.  
658
- 659 32. Schork AJ, Thompson WK, Pham P, Torkamani A, Roddey JC, Sullivan PF, Kelsoe  
660 JR, O'Donovan MC, Furberg H, Schork NJ, others: All SNPs are not created equal:  
661 genome-wide association studies reveal a consistent pattern of enrichment among  
662 functionally annotated SNPs. *PLoS Genet* 2013, 9:e1003449.  
663
- 664 33. Lee PH, O'Dushlaine C, Thomas B, Purcell SM: INRICH: interval-based enrichment  
665 analysis for genome-wide association studies. *Bioinformatics* 2012, 28:1797–9.  
666
- 667 34. Sklar P, Ripke S, Scott LJ, Andreassen OA, Cichon S, Craddock N, Edenberg HJ,  
668 Nurnberger JI, Rietschel M, Blackwood D, others: Large-scale genome-wide association  
669 analysis of bipolar disorder identifies a new susceptibility locus near ODZ4. *Nature Genet*  
670 2011, 43:977–983.  
671
- 672 35. Neale BM, Medland SE, Ripke S, Asherson P, Franke B, Lesch K-P, Faraone SV,  
673 Nguyen TT, Schäfer H, Holmans P, others: Meta-analysis of genome-wide association  
674 studies of attention-deficit/hyperactivity disorder. *J Am Acad Child Adolesc Psychiatry*  
675 2010, 49:884–897.  
676
- 677 36. Stahl EA, Raychaudhuri S, Remmers EF, Xie G, Eyre S, Thomson BP, Li Y,  
678 Kurreeman FA, Zhernakova A, Hinks A, others: Genome-wide association study meta-  
679 analysis identifies seven new rheumatoid arthritis risk loci. *Nature Genet* 2010, 42:508–  
680 514.  
681
- 682 37. Teslovich TM, Musunuru K, Smith AV, et al.: Biological, clinical and population  
683 relevance of 95 loci for blood lipids. *Nature* 2010, 466:707–13.  
684
- 685 38. International Consortium for Blood Pressure Genome-Wide Association Studies and  
686 others: Genetic variants in novel pathways influence blood pressure and cardiovascular  
687 disease risk. *Nature* 2011, 478:103–109.  
688
- 689 39. Locke AE, Kahali B, Berndt SI, Justice AE, Pers TH, Day FR, Powell C, Vedantam S,  
690 Buchkovich ML, Yang J, others: Genetic studies of body mass index yield new insights for  
691 obesity biology. *Nature* 2015, 518:197–206.  
692
- 693 40. Wood AR, Esko T, Yang J, Vedantam S, Pers TH, Gustafsson S, Chu AY, Estrada K,  
694 Luan J, Kutalik Z, others: Defining the role of common variation in the genomic and  
695 biological architecture of adult human height. *Nature Genet* 2014, 46:1173–1186.  
696
- 697 41. XXV World Congress of Psychiatric Genetics (WCPG): Poster Abstracts. European  
698 Neuropsychopharmacology; 2017.  
699
- 700 42. Gokhman D, Malul A, Carmel L: Inferring Past Environments from Ancient  
701 Epigenomes. *Molecular Biology and Evolution* 2017, 34:2429–2438.  
702

- 703 43. Gokhman D, Meshorer E, Carmel L: Epigenetics: it's getting old. Past meets future in  
704 paleoepigenetics. *Trends in ecology & evolution* 2016, 31:290–300.  
705
- 706 44. Hernando-Herraez I, Prado-Martinez J, Garg P, Fernandez-Callejo M, Heyn H,  
707 Hvilsom C, Navarro A, Esteller M, Sharp AJ, Marques-Bonet T: Dynamics of DNA  
708 methylation in recent human and great ape evolution. *PLoS Genet* 2013, 9:e1003763.  
709
- 710 45. Mendizabal I, Keller T, Zeng J, Soojin VY: Epigenetics and evolution. *Integr Comp*  
711 *Biol* 2014, 54:31–42.  
712
- 713 46. Molaro A, Hodges E, Fang F, Song Q, McCombie WR, Hannon GJ, Smith AD: Sperm  
714 methylation profiles reveal features of epigenetic inheritance and evolution in primates.  
715 *Cell* 2011, 146:1029–1041.  
716
- 717 47. Hernando-Herraez I, Heyn H, Fernandez-Callejo M, Vidal E, Fernandez-Bellon H,  
718 Prado-Martinez J, Sharp AJ, Esteller M, Marques-Bonet T: The interplay between DNA  
719 methylation and sequence divergence in recent human evolution. *Nucleic Acids Res* 2015,  
720 43:8204–8214.  
721
- 722 48. Heyn H, Moran S, Hernando-Herraez I, Sayols S, Gomez A, Sandoval J, Monk D,  
723 Hata K, Marques-Bonet T, Wang L, others: DNA methylation contributes to natural  
724 human variation. *Genome research* 2013, 23:1363–1372.  
725
- 726 49. Richter D, Grün R, Joannes-Boyau R, Steele TE, Amani F, Rué M, Fernandes P,  
727 Raynal J-P, Geraads D, Ben-Ncer A, others: The age of the hominin fossils from Jebel  
728 Irhoud, Morocco, and the origins of the Middle Stone Age. *Nature* 2017, 546:293–296.  
729
- 730 50. Hublin J-J, Ben-Ncer A, Bailey SE, Freidline SE, Neubauer S, Skinner MM,  
731 Bergmann I, Le Cabec A, Benazzi S, Harvati K, others: New fossils from Jebel Irhoud,  
732 Morocco and the pan-African origin of *Homo sapiens*. *Nature* 2017, 546:289–292.  
733
- 734 51. Mellars P: Why did modern human populations disperse from Africa ca. 60,000 years  
735 ago? A new model. *Proceedings of the National Academy of Sciences* 2006, 103:9381–  
736 9386.  
737
- 738 52. Kind C-J, Ebinger-Rist N, Wolf S, Beutelspacher T, Wehrberger K: The smile of the  
739 Lion Man. Recent excavations in Stadel Cave (Baden-Württemberg, southwestern  
740 Germany) and the restoration of the famous Upper Palaeolithic figurine. *Quartär* 2014,  
741 61:129–145.  
742
- 743 53. Aubert M, Brumm A, Ramli M, Sutikna T, Saptomo EW, Hakim B, Morwood M vd,  
744 van den Bergh GD, Kinsley L, Dosseto A: Pleistocene cave art from Sulawesi, Indonesia.  
745 *Nature* 2014, 514:223–227.  
746
- 747 54. Atkinson QD: Phonemic diversity supports a serial founder effect model of language  
748 expansion from Africa. *Science* 2011, 332:346–349.  
749
- 750 55. Harari YN: *Sapiens: A brief history of humankind*. Harvill Secker London; 2014.  
751

- 752 56. Norenzayan A, Shariff AF: The origin and evolution of religious prosociality. *Science*  
753 2008, 322:58–62.  
754
- 755 57. Briggs AW, Stenzel U, Meyer M, Krause J, Kircher M, Pääbo S: Removal of  
756 deaminated cytosines and detection of in vivo methylation in ancient DNA. *Nucleic Acids*  
757 *Res.* 2010, 38:e87.  
758
- 759 58. Fu Q, Li H, Moorjani P, Jay F, Slepchenko SM, Bondarev AA, Johnson PL, Aximu-  
760 Petri A, Prüfer K, de Filippo C, others: Genome sequence of a 45,000-year-old modern  
761 human from western Siberia. *Nature* 2014, 514:445–449.  
762
- 763 59. Fu Q, Meyer M, Gao X, Stenzel U, Burbano HA, Kelso J, Pääbo S: DNA analysis of  
764 an early modern human from Tianyuan Cave, China. *Proc. Natl. Acad. Sci. U.S.A.* 2013,  
765 110:2223–7.  
766
- 767 60. Seguin-Orlando A, Korneliusson TS, Sikora M, Malaspina A-S, Manica A, Moltke I,  
768 Albrechtsen A, Ko A, Margaryan A, Moiseyev V, others: Genomic structure in Europeans  
769 dating back at least 36,200 years. *Science* 2014, 346:1113–1118.  
770
- 771 61. Rasmussen M, Li Y, Lindgreen S, Pedersen JS, Albrechtsen A, Moltke I, Metspalu M,  
772 Metspalu E, Kivisild T, Gupta R, Bertalan M, Nielsen K, Gilbert MTP, Wang Y,  
773 Raghavan M, Campos PF, Kamp HM, Wilson AS, Gledhill A, Tridico S, Bunce M,  
774 Lorenzen ED, Binladen J, Guo X, Zhao J, Zhang X, Zhang H, Li Z, Chen M, Orlando L,  
775 Kristiansen K, Bak M, Tommerup N, Bendixen C, Pierre TL, Grønnow B, Meldgaard M,  
776 Andreassen C, Fedorova SA, Osipova LP, Higham TFG, Ramsey CB, Hansen TVO,  
777 Nielsen FC, Crawford MH, Brunak S, Sicheritz-Pontén T, Vilems R, Nielsen R, Krogh A,  
778 Wang J, Willerslev E: Ancient human genome sequence of an extinct Palaeo-Eskimo.  
779 *Nature* 2010, 463:757–62.  
780
- 781 62. Raghavan M, Skoglund P, Graf KE, Metspalu M, Albrechtsen A, Moltke I, Rasmussen  
782 S, Stafford TW, Orlando L, Metspalu E, Karmin M, Tambets K, Rootsi S, Mägi R,  
783 Campos PF, Balanovska E, Balanovsky O, Khusnutdinova E, Litvinov S, Osipova LP,  
784 Fedorova SA, Voevoda MI, DeGiorgio M, Sicheritz-Ponten T, Brunak S, Demeshchenko  
785 S, Kivisild T, Vilems R, Nielsen R, Jakobsson M, Willerslev E: Upper Palaeolithic  
786 Siberian genome reveals dual ancestry of Native Americans. *Nature* 2014, 505:87–91.  
787
- 788 63. Fu Q, Hajdinjak M, Moldovan OT, Constantin S, Mallick S, Skoglund P, Patterson N,  
789 Rohland N, Lazaridis I, Nickel B, others: An early modern human from Romania with a  
790 recent Neanderthal ancestor. *Nature* 2015, 524:216–219.  
791
- 792 64. Mathieson I, Lazaridis I, Rohland N, Mallick S, Patterson N, Roodenberg SA, Harney  
793 E, Stewardson K, Fernandes D, Novak M, others: Genome-wide patterns of selection in  
794 230 ancient Eurasians. *Nature* 2015, 528:499–503.  
795
- 796 65. Lazaridis I, Patterson N, Mittnik A, et al.: Ancient human genomes suggest three  
797 ancestral populations for present-day Europeans. *Nature* 2014, 513:409–13.  
798
- 799 66. Pedersen JS, Valen E, Velazquez AMV, Parker BJ, Rasmussen M, Lindgreen S, Lilje  
800 B, Tobin DJ, Kelly TK, Vang S, others: Genome-wide nucleosome map and cytosine

801 methylation levels of an ancient human genome. *Genome research* 2014, 24:454–466.  
802  
803 67. 1000 Genomes Project Consortium: An integrated map of genetic variation from 1,092  
804 human genomes. *Nature* 2012, 491:56–65.  
805  
806 68. Christoforou A, Dondrup M, Mattingsdal M, Mattheisen M, Giddaluru S, Nøthen  
807 MM, Rietschel M, Cichon S, Djurovic S, Andreassen OA, others: Linkage-disequilibrium-  
808 based binning affects the interpretation of GWASs. *Am J Hum Genet* 2012, 90:727–733.  
809  
810 69. R Core Team: *R: A Language and Environment for Statistical Computing*. Vienna,  
811 Austria: 2017 URL <https://www.R-project.org/>.  
812  
813

## 814 **Figure legends**

### 815 **Figure 1: Enrichment of DMR SNPs across SCZ, BPD, BMI and Height**

816 Quantile-Quantile (QQ) plots of GWAS SNPs for Schizophrenia (SCZ) with the extended  
817 MHC region masked (chr6: 25-35Mb), Bipolar Disorder (BPD), Body Mass Index (BMI)  
818 and Height. The X-axis shows expected  $-\log_{10}p$ -values under the null hypothesis. The Y-  
819 axis shows actual observed  $-\log_{10}p$ -values. The values for all GWAS SNPs are plotted in  
820 pink while the values for SNPs in linkage disequilibrium (LD) with DMRs are plotted in  
821 blue. Leftwards deflections from the null line (grey diagonal line) indicate enrichment of  
822 true signals - the greater the leftward deflection, the stronger the enrichment. Genomic  
823 correction was performed on all SNPs with global lambda.

824

### 825 **Figure 2: Comparison of enrichment of association with schizophrenia for SNPs**

#### 826 **within Human, Neanderthal and Denisovan DMRs**

827 The figure shows QQ plots for all schizophrenia (SCZ) GWAS SNPs in green while SNPs  
828 within the species-specific DMRs are plotted in red. The location of the MHC is unknown  
829 in Neanderthal and Denisovan genomes, so the MHC region was not masked in the human  
830 genome.

831

832 **Figure 3: Comparison of enrichment of association with schizophrenia for SNPs in**  
833 **LD with various evolutionary annotations**

834 QQ plots for association with schizophrenia (SCZ) of SNPs in different evolutionary  
835 datasets (DMRs - red, NSS - orange, Primate HARs (pHARs) - blue, HARs - magenta,  
836 PARs - dark green) versus schizophrenia GWAS with all SNPs (light green). SNPs are  
837 corrected for genomic inflation using global lambda.

838

839 **Figure 4: INRICH test for enrichment of association of DMR, NSS and Accelerated**  
840 **Region gene sets**

841 Corrected  $p$ -values based on performing multiple testing with bootstrapping 5000 times,  
842 with  $p = 0.1$  as threshold. The various evolutionary annotations compared are: DMR,  
843 human-specific DMRs; NSS, Neanderthal Selective Sweep; HAR, mammalian conserved  
844 regions that are accelerated in humans; PAR, mammalian conserved regions that are  
845 accelerated in primates; and PrimateHAR (pHAR), primate-conserved regions that are  
846 accelerated in humans.

847

**Figure 1**

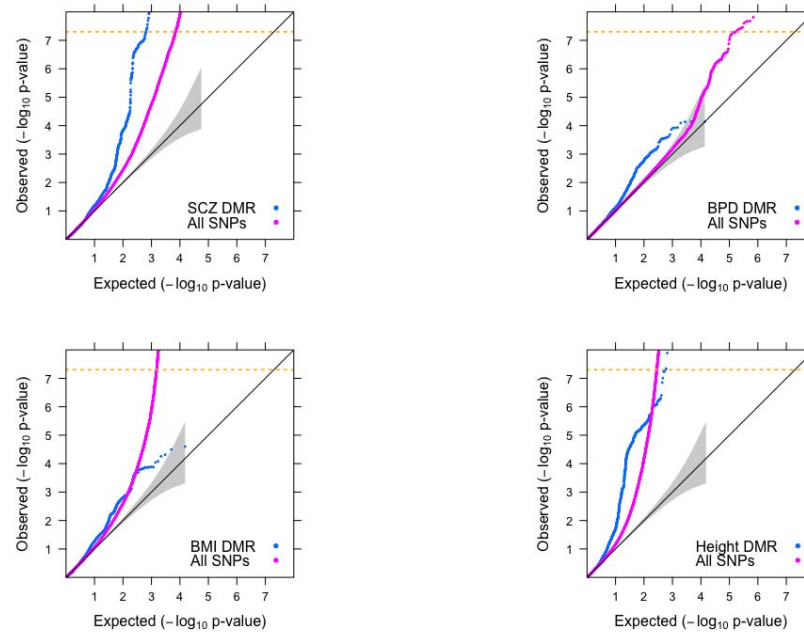

**Figure 2**

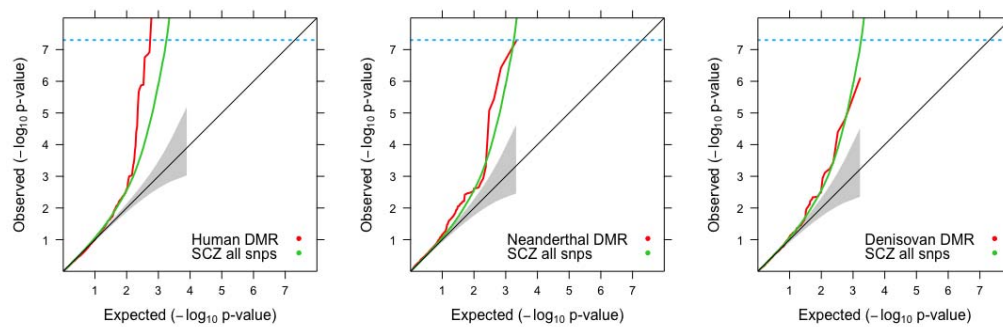

**Figure 3**

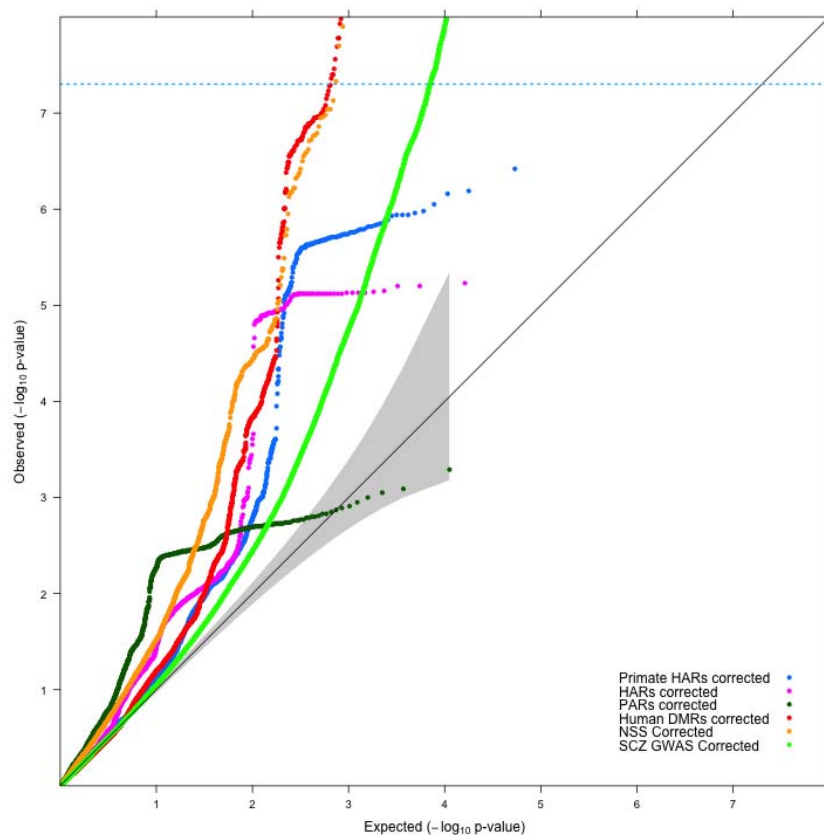

**Figure 4**

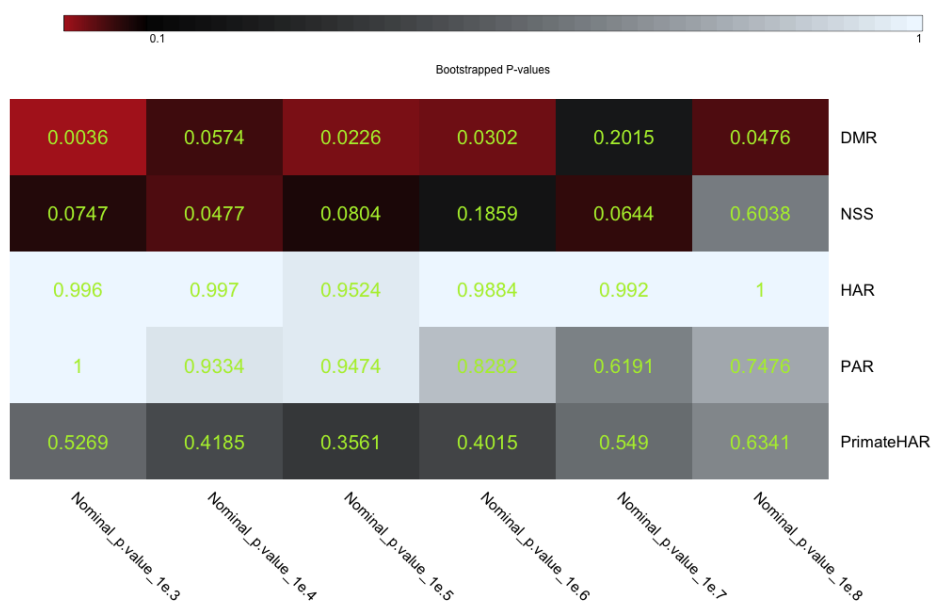

Source: https://www.biorxiv.org/content/10.1101/113175v2.full.pdf
